# Supplementary material
Source: Springer Nature journal article supplement (https://www.springerprofessional.de/resource/supplementary/13673_2011_15_MOESM7_ESM.pdf/11899340)
Supplement: MOESM7 [file 11899340]

## Admittance

| ID_Admit | TID | Hemorrhage | Unconsciou |
|----------|-----|------------|------------|
| 0201     | 011 | Yes        | Yes        |
| 0202     | 012 | No         | Yes        |
| 0203     | 012 | No         | Yes        |
| 0204     | 013 | Yes        | Yes        |
| ...      | ... | ...        | ...        |

n

1

Patient

| TID | Name  | Sex |
|-----|-------|-----|
| 011 | John  | M   |
| 012 | Mary  | F   |
| 013 | Caesa | M   |
| ... | ...   | ... |
